# Supplementary material for: Paediatric emergency department dog bite attendance during the COVID-19 pandemic: an audit at a tertiary children’s hospital
Source: PubMed Central journal article supplement — BMJ Paediatr Open. 2021 Apr 2;5(1):e001040. doi: 10.1136/bmjpo-2021-001040 (PMC8023759; doi:10.1136/bmjpo-2021-001040), 2021-04-02
Supplement: bmjpo-2021-001040.draft_revisions.pdf [file bmjpo-2021-001040.draft_revisions.pdf]

# BMJ Paediatrics Open

BMJ Paediatrics Open is committed to open peer review. As part of this commitment we make the peer review history of every article we publish publicly available.

When an article is published we post the peer reviewers' comments and the authors' responses online. We also post the versions of the paper that were used during peer review. These are the versions that the peer review comments apply to.

The versions of the paper that follow are the versions that were submitted during the peer review process. They are not the versions of record or the final published versions. They should not be cited or distributed as the published version of this manuscript.

BMJ Paediatrics Open is an open access journal and the full, final, typeset and author-corrected version of record of the manuscript is available on our site with no access controls, subscription charges or pay-per-view fees (<http://bmjpaedsopen.bmj.com>).

If you have any questions on BMJ Paediatrics Open's open peer review process please email [info.bmjpo@bmj.com](mailto:info.bmjpo@bmj.com)

# BMJ Paediatrics Open

## Paediatric Emergency Department dog bite attendance during the COVID-19 pandemic: an audit

|                               |                                                                                                                                                                                                                                                                                                                                                                                                                                                                                                                                                                                                               |
|-------------------------------|---------------------------------------------------------------------------------------------------------------------------------------------------------------------------------------------------------------------------------------------------------------------------------------------------------------------------------------------------------------------------------------------------------------------------------------------------------------------------------------------------------------------------------------------------------------------------------------------------------------|
| Journal:                      | <i>BMJ Paediatrics Open</i>                                                                                                                                                                                                                                                                                                                                                                                                                                                                                                                                                                                   |
| Manuscript ID                 | bmjpo-2021-001040                                                                                                                                                                                                                                                                                                                                                                                                                                                                                                                                                                                             |
| Article Type:                 | Original research                                                                                                                                                                                                                                                                                                                                                                                                                                                                                                                                                                                             |
| Date Submitted by the Author: | 27-Jan-2021                                                                                                                                                                                                                                                                                                                                                                                                                                                                                                                                                                                                   |
| Complete List of Authors:     | Tulloch, John; University of Liverpool, Institute of Infection, Veterinary and Ecological Sciences<br>Minford, Simon; Alder Hey Children's NHS Foundation Trust, Department of Plastic Surgery<br>Pimblett, Vicky; Alder Hey Children's NHS Foundation Trust, Department of Plastic Surgery<br>Rotheram, Matt; Alder Hey Children's NHS Foundation Trust, Emergency Department<br>Christley, Robert; Dogs Trust; University of Liverpool, Institute of Infection, Veterinary and Ecological Sciences<br>Westgarth, Carri; University of Liverpool, Institute of Infection, Veterinary and Ecological Sciences |
| Keywords:                     | COVID-19, Epidemiology                                                                                                                                                                                                                                                                                                                                                                                                                                                                                                                                                                                        |
|                               |                                                                                                                                                                                                                                                                                                                                                                                                                                                                                                                                                                                                               |

SCHOLARONE™  
Manuscripts

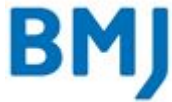

I, the Submitting Author has the right to grant and does grant on behalf of all authors of the Work (as defined in the below author licence), an exclusive licence and/or a non-exclusive licence for contributions from authors who are: i) UK Crown employees; ii) where BMJ has agreed a CC-BY licence shall apply, and/or iii) in accordance with the terms applicable for US Federal Government officers or employees acting as part of their official duties; on a worldwide, perpetual, irrevocable, royalty-free basis to BMJ Publishing Group Ltd ("BMJ") its licensees and where the relevant Journal is co-owned by BMJ to the co-owners of the Journal, to publish the Work in this journal and any other BMJ products and to exploit all rights, as set out in our [licence](#).

The Submitting Author accepts and understands that any supply made under these terms is made by BMJ to the Submitting Author unless you are acting as an employee on behalf of your employer or a postgraduate student of an affiliated institution which is paying any applicable article publishing charge ("APC") for Open Access articles. Where the Submitting Author wishes to make the Work available on an Open Access basis (and intends to pay the relevant APC), the terms of reuse of such Open Access shall be governed by a Creative Commons licence – details of these licences and which [Creative Commons](#) licence will apply to this Work are set out in our licence referred to above.

Other than as permitted in any relevant BMJ Author's Self Archiving Policies, I confirm this Work has not been accepted for publication elsewhere, is not being considered for publication elsewhere and does not duplicate material already published. I confirm all authors consent to publication of this Work and authorise the granting of this licence.

**Title:** Paediatric Emergency Department dog bite attendance during the COVID-19 pandemic: an audit

**Authors**

\*John SP Tulloch <sup>1</sup>

Simon Minford <sup>2</sup>

Vicky Pimblett <sup>2</sup>

Matt Rotheram <sup>3</sup>

Robert M Christley <sup>4,1</sup>

Carri Westgarth <sup>1</sup>

**Affiliations**

1. Institute of Infection, Veterinary and Ecological Sciences, University of Liverpool, CH64 7TE, UK
2. Department of Plastic Surgery, Alder Hey Children's NHS Foundation Trust, L14 5AB, UK
3. Emergency Department, Alder Hey Children's NHS Foundation Trust, L14 5AB, UK
4. Dogs Trust, London, EC1V 7RQ, UK

**\*Corresponding Author:** [jtulloch@liverpool.ac.uk](mailto:jtulloch@liverpool.ac.uk)

Department of Livestock and One Health, Institute of Infection, Veterinary and Ecological Sciences, Leahurst Campus, University of Liverpool, Chester High Road, Wirral, CH64 7TE, UK

**Word Count:** 2438

**Key Words:** Dog bites, paediatrics, emergency medicine, emergency department, COVID-19, public health, UK

**Abstract****Background**

Responses to the COVID-19 pandemic include strict public health measures, such as national lockdowns. During these measures paediatric emergency department attendance rates have declined and the prevalence of presenting complaints has changed. This study sought to identify whether dog bite attendance rates and victim demographics changed during COVID-19 public health measures.

**Methods**

An audit was conducted of emergency department attendance data from a United Kingdom tertiary paediatric hospital between January 2016 and September 2020. Attendance rates for dog bites and victim demographics were explored using Chi<sup>2</sup> tests and multivariable Poisson regression. Monthly attendance rates in 2020 were compared against predicted attendance rates based on previous years data

**Results**

Dog bite attendance rates rose in conjunction with the introduction of COVID-19 public health measures and reached a peak in July 2020 (12.8 dog bites per 1000 attendances); more than four times higher than expected. By September 2020 attendance rates had returned to normal. The demographic profile of child dog bite victims remained the same. There was no overall difference in attendance rates between boys and girls. Boys had the highest attendance rates in 7-12 year olds, girls in 4-6 year olds. Girls showed higher attendance rates in the summer, whilst boys attendance rates were constant throughout the year. COVID-19 public health measures were associated with a 78% increase in attendance for boys, and an 66% increase in girls.

**Conclusions**

COVID-19 national public health measures were associated with an increase in paediatric emergency department dog bite attendance, and may be due to increased child exposure to dogs via 'stay at home' orders and school closures. National lockdowns are likely to continue globally throughout the COVID-19 pandemic; this is likely to result in more dog bites. Urgent public health communication and injury prevention strategies are needed to help prevent these avoidable injuries.

**What is known about the subject:**

- Children are frequent dog bite victims.
- Most children are bitten in the home, by a dog that they know.
- In adults, men are more likely to be bitten than women.

**What this study adds:**

- Emergency attendance for dog bites to children were four times higher during COVID-19 public health measures, than expected.
- The victim profile, regarding the age and sex of the child, did not change
- COVID-19 public health measures, such as lockdowns and school closures, may result in increased dog bites.

**Introduction:**

The COVID-19 global pandemic, caused by SARS-CoV-2 (severe acute respiratory syndrome coronavirus 2), has affected medicine and public health in a multitude of unforeseen ways. One of these was the significant reduction in patient attendance at paediatric emergency departments during COVID-19 national lockdowns.[1,2] Absolute attendance reduced between 27-72%,[2,3] though this reduction was not seen across all presenting complaints. For example, attendance for trauma has increased and decreased, dependent upon the reporting hospital.[1-3] One trauma of increasing concern is dog bites.

Dog bite hospital admission rates across England have tripled in adults between 1998 and 2018, yet remained stable in children, with a mean child annual admission rate of 14.4 dog bite hospital admissions per 100,000 population per year.[4] Both sexes have their highest admission rates in childhood, peaking between 5-14 years old for boys and 5-9 years old for girls.

The majority of dog bite injuries to children occur to the head;[5-8] 73.3% in English hospital admissions. In Canadian paediatric emergency departments, 25% of bites were classified as severe, 15% of victims were admitted, 7% needed operations, and 0.3% resulted in fatalities.[9] Children are overrepresented in fatal dog attacks; in the USA 55.6% of victims were less than 10 years old,[10] in Canada 86% were under twelve years old,[11] whilst in Europe 16% were less than 10, with 3% less than a year old.[12] United Kingdom (UK) fatality numbers are unknown. Even with excellent management of wounds, the physical and psychological consequences may be long-lasting,[13,14] with 70% of parents of dog bite victims having reported behavioural concerns in their children as a sequelae of the bite.[14]

1  
2  
3 During the COVID-19 pandemic, many public health measures directly affected children, primarily  
4 the implementation of national lockdowns, 'stay at home' orders, the restriction of socialisation  
5 outside their household unit, and the closure of schools.[15,16] Such measures resulted in children  
6 spending more time than usual at home. Previous research has demonstrated that dogs provided  
7 people and families with many positive benefits in lockdown by reducing loneliness, and improving  
8 well-being.[17] However, it is known that the majority of child dog bite victims are bitten inside the  
9 home, ranging from 41-91%,[4,8,18,19] and most dogs involved are known to the victim.[9,18] We,  
10 and others, have theorised that the increased time at home, and resultant increased contact time  
11 with a pet dog, could lead to more dog bites and a subsequent increase in dog bite attendance rates  
12 at paediatric emergency departments.[20,21] The aim of this study was to understand the impact  
13 that English COVID-19 public health measures had on emergency department dog bite attendance  
14 rates in a paediatric hospital.  
15  
16  
17  
18  
19  
20  
21  
22  
23

### 24 **Methods**

25  
26 An audit of emergency department records was performed at Alder Hey Children's Hospital to  
27 identify trends in attendance rates for dog bites, to explore patient demographics between the 1<sup>st</sup> of  
28 January 2016 and the 30<sup>th</sup> September 2020, and identify any impact associated with the COVID-19  
29 public health measures. Alder Hey Children's Hospital has one of the busiest paediatric emergency  
30 departments in the UK. It primarily serves the children of Liverpool and surrounding areas, but major  
31 traumas are received from North-West England, North Wales, and the Isle of Man.  
32  
33  
34  
35

36 Anonymised data were collected from hospital patient electronic health records. These contain  
37 standard information regarding clinical and safeguarding aspects of the child presenting to the  
38 emergency department. The following variables were captured for all attendees of the emergency  
39 department; date of attendance, age, sex, and whether a dog bite was their reason for attendance  
40 (as a binary term). Annual and monthly attendance rates (dog bites per 1000 attendances) were  
41 calculated, for the whole audit period, with associated confidence intervals calculated using Byar's  
42 method. Monthly attendance rates were smoothed using LOESS (locally estimated scatterplot  
43 smoothing) methods.[22] Monthly attendance rates for 2020 were predicted based on monthly  
44 attendance rates of 2016-2019, using the ETS (Error, trend and seasonality) method.[23-25]  
45  
46  
47  
48  
49  
50  
51

52 For this analysis, a binary variable ('COVID-19 Public Health Measures') was assigned to each patient  
53 to indicate whether any national COVID-19 public health measures were in place at the time of  
54 attendance; this variable was assigned the value 1 for attendances within the months March-  
55 September 2020,[15,16] and the value 0 otherwise. To compare the demographics (sex and age) of  
56 dog bite victims during and outside of COVID-19 public health measures a Chi-squared test was  
57  
58  
59  
60

1  
2  
3 performed. Age groups were defined as infants (<12 months old), toddlers (1-3 years old), early  
4 childhood (4-6 years old), middle childhood (7-12 years old), and adolescents (13-17 years old).[26]  
5  
6

7 Interrupted Poisson regression time series were performed to assess the following variables  
8 association with monthly attendances for dog bites; time (a linear term, with each unit equating to  
9 an individual month), month of the year, sex, age group, and COVID-19 public health measures. The  
10 number of dog bite victims per month was used as the numerator, whilst the denominator was the  
11 emergency department attending population. Sex specific multivariable models were created.  
12 Interaction between age and sex often occurs when analysing health care data. Thus, presenting sex  
13 stratified models provided clarity to our results, in addition to delivering clear sex dis-aggregated  
14 data as recommended by the World Health Organization.[27] Each model used attendance data for  
15 each specified sex as their denominator. A backwards stepwise process was performed to select the  
16 models with the best fit (only these will be presented). All models were checked for the presence of  
17 any interaction terms. Goodness-of-fit Chi-squared tests for Poisson models were used to assess  
18 model performance.  
19  
20  
21  
22  
23  
24  
25  
26  
27

28 All statistical analyses were carried out using R language (version 3.5.3). Results were deemed  
29 statistically significant where  $p < 0.05$ . Patients or the public were not involved in this research.  
30  
31

## 32 **Results**

33  
34 Between the 1<sup>st</sup> January 2016 and the 30<sup>th</sup> September 2020, 919 individuals attended Alder Hey  
35 Children's Hospital's emergency department for a dog bite, representing an overall attendance rate  
36 of 3.33 dog bites per 1000 attendances (95% CI 3.13-3.56). There was a slight increase in annual  
37 attendance rate from 2.65 (95% CI 2.26-3.09) in 2016 to 3.19 (2.77-3.66) in 2019, followed by a  
38 sharp increase in 2020 to 5.82 (95% CI 5.04-6.69) (Fig 1).  
39  
40  
41  
42

43 Prior to March 2020 the mean monthly total attendance was 5035 (95% CI 4899-5171), and the  
44 mean monthly dog bite attendance was 15 cases (95% CI 14-16). The lowest monthly total number  
45 of attendances for dog bites was recorded in April 2020 (n=2056), this represents a 2.45 times  
46 reduction (Fig 2). The highest monthly dog bite attendance was in July 2020 (n=44), an almost three-  
47 fold increase (ratio: 2.93) compared to mean monthly dog bite attendance.  
48  
49  
50

51  
52 Monthly attendance rates prior to 2020 revealed a consistent yet fluctuating pattern of attendance  
53 rates, ranging from 1.34 dog bites per 1000 attendances to 5.65 dog bites per 1000 attendances,  
54 with a mean monthly attendance rate of 3.05 (95% CI 2.76-3.35) (Fig 3).  
55  
56  
57  
58  
59  
60



Attendance rate data for 2020 deviated from the projected data from May through to August, peaking in July with 12.78 dog bites per 1000 attendances (95% CI 9.41-16.99). This peak reflected a quadrupling (ratio: 4.19) of the average monthly attendance rate for dog bites.

There was no significant difference in the proportion of males and females attending based on whether they attended during COVID-19 public health measures or not ( $\chi^2=0.17$ ,  $p=0.68$ ) (Table 1), nor was there a difference in the proportion of ages attending ( $\chi^2=3.92$ ,  $p=0.42$ ).

|                           | COVID-19 Public Health Measures Absent (Jan 2019-Feb 2020) | COVID-19 Public Health Measures Present (March 2020-Sept 2020) | p value |
|---------------------------|------------------------------------------------------------|----------------------------------------------------------------|---------|
| <b>Sex</b>                |                                                            |                                                                |         |
| Male                      | 51.9% (n=393)                                              | 53.7% (n=87)                                                   |         |
| Female                    | 48.1% (n=364)                                              | 46.3% (n=75)                                                   | p=0.68  |
| <b>Age</b>                |                                                            |                                                                |         |
| Infant (<12 months)       | 3.6% (n=27)                                                | 1.9% (n=3)                                                     |         |
| Toddler (1-3 years)       | 26.6% (n=201)                                              | 26.5% (n=43)                                                   |         |
| Early Child (4-6 years)   | 21.9% (n=166)                                              | 27.2% (n=44)                                                   |         |
| Middle Child (7-12 years) | 33.4% (n=253)                                              | 33.3% (n=54)                                                   |         |
| Adolescent (13-17 years)  | 14.5% (n=110)                                              | 11.1% (n=18)                                                   | p=0.42  |
| <b>Total</b>              | 757                                                        | 162                                                            |         |

Table 1 Demographics of paediatric dog bite victims stratified by the presence of national COVID-19 public health measures.

COVID-19 public health measures were independently associated with a 66% increase in dog bite attendance rates in females, and a 78% increase in males (Table 2).

1  
2  
3  
4  
5  
6  
7  
8  
9  
10  
11  
12  
13  
14  
15  
16  
17  
18  
19  
20  
21  
22  
23  
24  
25  
26  
27  
28  
29  
30  
31  
32  
33  
34  
35  
36  
37  
38  
39  
40  
41  
42  
43  
44  
45  
46  
47  
48  
49  
50  
51  
52  
53  
54  
55  
56  
57  
58  
59  
60

| Variable                                            | Univariable Analysis |         | Female Multivariable Model |         | Male Multivariable Model |         |
|-----------------------------------------------------|----------------------|---------|----------------------------|---------|--------------------------|---------|
|                                                     | ARR (95% CI)         | p-value | ARR (95% CI)               | p-value | ARR (95% CI)             | p-value |
| <b>COVID-19 Public Health Measures (Ref=Absent)</b> |                      |         |                            |         |                          |         |
| Present                                             | 2.29 (1.93-2.71)     | <0.001  | 1.66 (1.18-2.32)           | <0.001  | 1.78 (1.29-2.44)         | <0.001  |
| <b>Time (Linear)</b>                                | 1.01 (1.01-1.02)     | <0.001  | 1.00 (1.00-1.01)           | 0.38    | 1.01 (1.00-1.01)         | 0.03    |
| <b>Year (Ref=2016)</b>                              |                      |         |                            |         |                          |         |
| 2017                                                | 1.06 (0.85-1.32)     | 0.59    | N/A                        |         | N/A                      |         |
| 2018                                                | 1.26 (1.02-1.55)     | 0.03    | N/A                        |         | N/A                      |         |
| 2019                                                | 1.20 (0.98-1.48)     | 0.08    | N/A                        |         | N/A                      |         |
| 2020                                                | 2.20 (1.78-2.71)     | <0.001  | N/A                        |         | N/A                      |         |
| <b>Month (Ref = January)</b>                        |                      |         |                            |         |                          |         |
| February                                            | 1.23 (0.88-1.72)     | 0.23    | 1.69 (1.02-2.88)           | 0.05    | 0.95 (0.60-1.48)         | 0.81    |
| March                                               | 0.97 (0.69-1.37)     | 0.87    | 1.27 (0.75-2.19)           | 0.38    | 0.60 (0.37-0.96)         | 0.04    |
| April                                               | 1.41 (1.02-1.97)     | 0.04    | 1.66 (0.99-2.84)           | 0.06    | 1.08 (0.70-1.67)         | 0.73    |
| May                                                 | 1.76 (1.29-2.40)     | <0.001  | 2.26 (1.41-3.76)           | <0.01   | 1.10 (0.73-1.67)         | 0.65    |
| June                                                | 1.57 (1.14-2.17)     | <0.01   | 1.68 (1.01-2.86)           | 0.05    | 1.12 (0.74-1.70)         | 0.60    |
| July                                                | 1.73 (1.27-2.37)     | <0.001  | 2.05 (1.26-3.42)           | <0.01   | 1.11 (0.74-1.69)         | 0.61    |
| August                                              | 1.98 (1.45-2.72)     | <0.001  | 2.28 (1.39-3.83)           | <0.01   | 1.26 (0.83-1.93)         | 0.28    |
| September                                           | 1.36 (0.99-1.90)     | 0.06    | 1.75 (1.06-2.96)           | 0.03    | 0.75 (0.48-1.17)         | 0.20    |
| October                                             | 0.99 (0.69-1.41)     | 0.94    | 1.28 (0.73-2.27)           | 0.39    | 0.84 (0.52-1.34)         | 0.47    |
| November                                            | 0.68 (0.45-1.00)     | 0.05    | 1.08 (0.60-1.93)           | 0.81    | 0.48 (0.27-0.82)         | 0.01    |
| December                                            | 1.03 (0.72-1.48)     | 0.86    | 1.05 (0.57-1.91)           | 0.87    | 1.06 (0.67-1.66)         | 0.81    |
| <b>Sex (Ref=Female)</b>                             |                      |         |                            |         |                          |         |
| Male                                                | 0.91 (0.80-1.03)     | 0.14    | N/A                        |         | N/A                      |         |
| <b>Age (Ref = Toddler, 1-3 years old)</b>           |                      |         |                            |         |                          |         |
| Infant (<12 months)                                 | 0.19 (0.13-0.28)     | <0.001  | 0.17 (0.09-0.29)           | <0.001  | 0.21 (0.12-0.35)         | <0.001  |
| Early Childhood (4-6 years old)                     | 1.75 (1.45-2.10)     | <0.001  | 1.89 (1.46-2.45)           | <0.001  | 1.53 (1.17-2.00)         | <0.01   |
| Middle Childhood (7-12 years old)                   | 1.70 (1.44-2.01)     | <0.001  | 1.44 (1.13-1.85)           | <0.01   | 1.83 (1.46-2.31)         | <0.001  |
| Adolescent (13-17 years old)                        | 1.30 (1.05-1.61)     | 0.01    | 0.94 (0.68-1.30)           | 0.72    | 1.65 (1.23-2.19)         | <0.001  |

Table 2 – Univariable and multivariable Poisson analysis of monthly paediatric dog bite attendance rates in an emergency department (COVID-19 Public Health Measure were present March 2020 to September 2020. ARR=Attendance Rate Ratio. CI = Confidence interval)

Females had the highest dog bite attendance rates from May through to September. In contrast, male attendance rates were similar throughout the year except in March and November which displayed significantly lower rates. Female attendance rates showed similar attendance rates between toddlers and adolescents, with early and middle childhood showing the highest rates (peaking in early childhood), and infants the lowest. Male age attendance rates peaked in middle childhood. All male age groups had significantly higher rates than toddlers except infants who were significantly lower. To achieve final model fit the 'year' variable was excluded from both models. Both male and female models had good model fits with small residual differences (male model  $p=0.66$ , female model  $p=0.94$ ). No interaction terms were identified.

## Discussion

This study highlights that COVID-19 public health measures were associated with an increase in paediatric dog bite emergency department attendance rates, potentially due to children spending more time at home, with greater exposure to dogs. Additionally, the demographics of children at risk of dog bites have remained the same during this period. These results can be used to underpin the need for an evidence-based approach to dog bite injury prevention strategies targeted at children and their guardians during this pandemic, and future ones.

Following four years of stable monthly patterns of rates of emergency department attendance for dog bites, there was a sharp increase in monthly attendance rates between April and August 2020, an effective quadrupling. This is confirmed by a clear statistical association between the period of COVID-19 public health measures and a rise in dog bite attendances.

The national lockdown (March-May 2020),[15,16] saw a rapid reduction in overall emergency attendance levels, which reached their lowest in April. It was expected that overall attendance levels would decline as patients and parents were fearful of hospital acquired COVID-19 and were told not to seek medical aid unless absolutely necessary.[1–3] However, children continued to attend Alder Hey for dog bites, despite other reasons for attendance decreasing.

Our dog bites did not dramatically increase until May, over a month into the lockdown period. The initial stable level of dog bites during lockdown was unexpected given another study reported a rapid increase in dog bite attendance as soon as their lockdown began.[20] During the initial period, life satisfaction and happiness in adults declined, with anxiety levels raised.[28] Rates of self-harm and domestic violence also rose.[29,30] These studies highlight that in some households the normal emotional palette had been disrupted, and this could feasibly include dogs, who are viewed as family members. Dogs' routines also changed drastically during the first lockdown with 80% spending more time with children, and having less socialisation with other dogs and less exercise.[31] Dog owners reported behavioural changes in their dogs and many reported a hesitancy to walk their dog due to COVID-19 infection risks.[32] The observed time lag in attendances for bites may be due to a lag in household risk or a lag in attending hospitals.

Bite risk may not have increased immediately due to a range of reasons. It may have taken some time for dogs to exceed their tolerance threshold for behaviours directed towards them, and/or due to the accumulative effect of separate triggering experiences,[33] particularly where there was greater activity occurring within homes during lockdown. Parental supervision of their children with dogs within the home is often limited,[34] and this may have been further impacted during lockdown with parents having to juggle multiple conflicting demands on their time. In lockdown

1  
2  
3 there was also a fear of attending hospitals,[35] so it is possible that less severe dog bite injuries  
4 were managed at home.  
5

6  
7 From May through to July the number of dog bite attendances increased faster than overall  
8 attendance number, leading to a spike in dog bites per 1000 attendances. During this period,  
9 relaxation of public health restrictions and summer weather meant there was potentially more  
10 opportunity for children to be exposed to non-household dogs, providing another source of risk  
11 perhaps more absent previously. There may also have been increased exposure due to proliferation  
12 of dog adoptions and acquisition of 'pandemic puppies' as 2020 progressed.[36,37] Further,  
13 according to UK Kennel Club research, many new puppies were bought on impulse with little  
14 research.[38] Compounded by difficulty accessing professional advice due to 'emergency only'  
15 veterinary provision,[39] and closure of training classes, many dogs acquired during 2020 may have  
16 had inadequate training and socialisation, which may result in a greater likelihood to biting.  
17  
18  
19  
20  
21  
22  
23

24 August and September saw declining attendance rates due to dog bites, returning to the normal  
25 range in September coincident with schools reopening,[15,16] and likely resulted in children  
26 spending less time at home with dogs. In a study in Colorado, dog bite attendance rates were not  
27 assessed beyond cessation of their lockdown,[20] and it is possible that, as public health measures  
28 eased attendance rates would have returned to normal as our data has.  
29  
30  
31  
32

33 This study found that the sex and age profile of dog bite victims remained the same during the  
34 COVID-19 public health measures, in line with available international trauma data.[1,3] Our data  
35 confirms dog bite seasonality,[4,8,19] but to the best of our knowledge, this work is the first to  
36 describe sex differences related to dog bite seasonality, with dog bites to girls increasing during the  
37 summer, but not to boys; research is needed to understand why.  
38  
39  
40  
41  
42

### 43 **Limitations**

44 The main limitation of these data is how representative they are of the wider UK population. Alder  
45 Hey Children's Hospital is one of Europe's largest paediatric hospitals, and the community it serves  
46 has one of the largest hospital admission rates for dog bites in the country.[4] This research needs to  
47 be repeated at a national scale. For this audit, only case count and basic demographic information of  
48 the victims was captured. Further work exploring the association of COVID-19 public health  
49 measures with severity and anatomical location of the bites, and the context of the bite, is critically  
50 important if we are to understand why dog bites increased. The variable 'COVID-19 Public Health  
51 Measures' encompasses a complex range of measures varying in timing and likely impact. It is likely  
52 that multiple confounding and interacting factors led to the increase in dog bite attendance rates. It  
53  
54  
55  
56  
57  
58  
59  
60

1  
2  
3 was felt that the pragmatic decision to choose a broad definition was justified. All our hypotheses as  
4 to why dog bites rose are speculative, and more research is needed.  
5  
6

### 7 **Conclusions**

8  
9 On the 5<sup>th</sup> January 2021 the UK was once again told to 'Stay at Home'; this third COVID-19 lockdown  
10 is expected to last at least two months. Lockdowns across the world will continue until public health  
11 measures are successful in bringing the COVID-19 pandemic to an end. Until that time, lockdowns  
12 and school closures are likely to be associated with a rise in paediatric dog bites. The victims who  
13 attend emergency departments probably have the most severe injuries and represent only a portion  
14 of the bitten population. There will be potentially thousands of children who receive preventable  
15 and life changing physical and psychological injuries. Urgent public health communication and  
16 education is needed to raise awareness of increased dog bite risk and promote safe interactions with  
17 dogs, thus ensuring that waves of dog bites do not follow strict COVID-19 public health measures.  
18  
19  
20  
21  
22  
23  
24  
25  
26  
27  
28  
29  
30  
31  
32  
33  
34  
35  
36  
37  
38  
39  
40  
41  
42  
43  
44  
45  
46  
47  
48  
49  
50  
51  
52  
53  
54  
55  
56  
57  
58  
59  
60

1  
2  
3 **Acknowledgements:** This work uses data provided by patients and collected by Alder Hey Children's  
4 Hospital as part of their care and support and would not be possible without access to these data.  
5 These data lead to valuable improvements in research and patient care. We would like to  
6 acknowledge the staff of Alder Hey Children's hospital who provide incredible care and support to  
7 the communities they serve. Finally, we would like to thank the Merseyside Dog Safety Partnership  
8 (<https://merseydogsafe.co.uk/>) who provided excellent advice about our work, and who strive to  
9 help local communities keep their dogs, children, family and friends safe.  
10  
11  
12  
13  
14

15 **Author Contribution:** JT, SM, MR, and CW conceptualised and designed the study. SM and VP  
16 collected, cleaned and anonymised the data. JT and RC designed and performed the data analysis. JT  
17 and CW drafted the initial manuscript. All authors reviewed and revised the manuscript, and  
18 approved of the final submitted manuscript.  
19  
20  
21  
22

23 **Funding:** The authors received no funding for this research from any funding agency in the public,  
24 commercial or not for profit sectors.  
25  
26

27 **Competing Interests:** None declared by JT, SM, MR, VP and CW. RC is employed by Dogs Trust, the  
28 UK's largest dog welfare charity; Dogs Trust had no influence on the design of the study; in the  
29 collection, analyses, or interpretation of data; in the writing of the manuscript, or in the decision to  
30 publish the results.  
31  
32  
33

34 **Patient and public involvement:** Patients and/or the public were not involved in the design, or  
35 conduct, or reporting, or dissemination plans of this research.  
36  
37  
38

39 **Patient consent for publication:** Not required.  
40  
41

42 **Ethics approval:** The study was defined as clinical audit and as such Research Ethics Committee  
43 Review was not necessary. The audit was approved by the Alder Hey Children's NHS Foundation  
44 Trust (Audit Reference Number: 6193).  
45  
46  
47  
48

49 **Data availability statement:** Data are available on reasonable request.  
50  
51  
52  
53  
54  
55  
56  
57  
58  
59  
60

## References

- 1 Chaiyachati BH, Agawu A, Zorc JJ, et al. Trends in pediatric emergency department utilization after institution of Coronavirus Disease-19 mandatory social distancing. *J Pediatr* 2020;226:274-277.e1. doi:10.1016/j.jpeds.2020.07.048 [published Online First: 20 July 2020]
- 2 Keays G, Freeman D, Gagnon I. Injuries in the time of COVID-19. *Heal Promot Chronic Dis Prev Canada* 2020;40:336-41. doi:10.24095/hpcdp.40.11/12.02 [published Online First: 11 Sept 2020]
- 3 McDonnell T, Nicholson E, Conlon C, et al. Assessing the impact of COVID-19 public health stages on paediatric emergency attendance. *Int J Environ Res Public Health* 2020;17:6719. doi:10.3390/ijerph17186719 [published Online First: 15 Sept 2020]
- 4 Tulloch JSP, Owczarczak-Garstecka SC, Fleming KM, et al. English hospital episode data analysis (1998 – 2018) reveal that the rise in dog bite hospital admissions is driven by adult cases. *Sci Rep* 2021;11:1767. doi: 10.1038/s41598-021-81527-7 [published Online First: 19 Jan 2021]
- 5 Morgan M, Palmer J. Dog bites. *BMJ* 2007;334:413. doi:10.1136/bmj.39105.659919.BE [published Online First: Feb 22 2007]
- 6 Rollett R, Clancy R, Taib BG, et al. RE: Not a plastic surgeon's best friend: Dog bites an increasing burden on UK plastic surgery services. *J Plast Reconstr Aesthetic Surg* 2019;72:685-710. doi:10.1016/j.bjps.2018.12.053 [published Online First: 15 Jan 2019]
- 7 Mannion CJ, Graham A. Dog bite injuries in hospital practice. *Br J Hosp Med* 2016;77:C165-8. doi:10.12968/hmed.2016.77.10.C165. [published Online First: 10 Oct 2016]
- 8 Loder RT. The demographics of dog bites in the United States. *Heliyon* 2019;5:e01360. doi:10.1016/j.heliyon.2019.e01360 [published Online First: 20 March 2019]
- 9 Lang ME, Klassen T. Dog bites in Canadian children: A five-year review of severity and emergency department management. *Can J Emerg Med* 2005;7:309-14. doi:10.1017/S1481803500014494 [published Online First: 21 May 2015]
- 10 Langley RL. Human fatalities resulting from dog attacks in the United States, 1979-2005. *Wilderness Environ Med* 2009;20:19-25. doi:10.1580/08-WEME-OR-213.1
- 11 Raghavan M. Fatal dog attacks in Canada, 1990-2007. *Can Vet J* 2008;49:577-81.
- 12 Sarenbo S, Svensson PA. Bitten or struck by dog: A rising number of fatalities in Europe,

- 1  
2  
3 1995–2016. *Forensic Sci Int* 2020;318:110592. doi:10.1016/j.forsciint.2020.110592.  
4 [published Online First: 12 Nov 2020]  
5  
6  
7 13 Jakeman M, Oxley JA, Owczarczak-Garstecka SC, et al. Pet dog bites in children: management  
8 and prevention. *BMJ Paediatr Open* 2020;4:e000726. doi:10.1136/bmjpo-2020-000726.  
9 [published Online First: 11 Aug 2020]  
10  
11  
12  
13 14 Boat BW, Dixon CA, Pearl E, et al. Pediatric dog bite victims : a need for a continuum of care.  
14 *Clin Pediatr (Phila)* 2012;51:473-7. doi:10.1177/0009922811435504. [published Online First:  
15 31 Jan 2012]  
16  
17  
18  
19 15 Coronavirus Act 2020 (c7). <https://www.legislation.gov.uk/ukpga/2020/7/contents/enacted>  
20  
21 16 The Health Protection (Coronavirus, Restrictions) (England) Regulations 2020.  
22 <https://www.legislation.gov.uk/uksi/2020/350/contents/made>  
23  
24  
25 17 Oliva JL, Johnston KL. Puppy love in the time of Corona: dog ownership protects against  
26 loneliness for those living alone during the COVID-19 lockdown. *Int J Soc Psychiatry*  
27 2020;Published Online First: 2020: 0020764020944195. doi:10.1177/0020764020944195.  
28 [published Online First: 23 Jul 2020]  
29  
30  
31  
32 18 Oxley JA, Christley R, Westgarth C. Contexts and consequences of dog bite incidents. *J Vet*  
33 *Behav* 2018;23:33–9. doi:10.1016/j.jveb.2017.10.005. [published Online First: 28 Oct 2017]  
34  
35  
36 19 Cornelissen JMR, Hopster H. Dog bites in The Netherlands: A study of victims, injuries,  
37 circumstances and aggressors to support evaluation of breed specific legislation. *Vet J*  
38 2010;186:292–8. doi:10.1016/j.tvjl.2009.10.001. [published Online First 29 Oct 2009]  
39  
40  
41  
42 20 Dixon CA, Mistry RD. Dog Bites in children surge during Coronavirus Disease-2019: A case for  
43 enhanced prevention. *J Pediatr* 2020;225:231–2. doi:10.1016/j.jpeds.2020.06.071. [published  
44 Online First: 25 Jun 2020]  
45  
46  
47  
48 21 Merseyside Dog Safety Partnership. Campaign: Help fight COVID-19 by staying safe around  
49 dogs. 2020. <https://merseydogsafe.co.uk/help-fight-covid-19-by-staying-safe-around-dogs/>  
50 [accessed 14 Jan 2021]  
51  
52  
53 22 Jacoby WG. Loess: A nonparametric, graphical tool for depicting relationships between  
54 variables. *Elect Stud* 2000;19:577–613. doi:10.1016/S0261-3794(99)00028-1  
55  
56  
57 23 Hyndman R, Khandakar Y. Automatic time series forecasting: the forecast package for R. *J*  
58 *Stat Softw* 2008;27. doi: 10.18637/jss.v027.i03  
59  
60



- 1  
2  
3 24 Wickham H, Averick M, Bryan J, et al. Welcome to the Tidyverse. *J Open Source Softw*  
4 2019;4:1686. doi:10.21105/joss.01686  
5  
6  
7 25 Hyndman R, Athanasopoulos G. Forecasting: principles and practice. OTexts:Melbourne,  
8 Australia 2018. OTexts.com/fpp2. [accessed 14 Jan 2021]  
9  
10  
11 26 Abdel-Rahman SM, Amidon GL, Kaul A, et al. Summary of the National Institute of Child  
12 Health and Human Development-best pharmaceuticals for Children Act Pediatric Formulation  
13 Initiatives Workshop-Pediatric Biopharmaceutics Classification System Working Group. *Clin*  
14 *Ther* 2012;34:S11-24. doi:10.1016/j.clinthera.2012.09.014 [published Online First 1 Nov 2013]  
15  
16  
17  
18 27 World Health Organization. World health statistics 2019: monitoring health for the SDGs,  
19 sustainable development goals. <https://apps.who.int/iris/handle/10665/324835>. [accessed  
20 14 Jan 2021]  
21  
22  
23  
24 28 Office for National Statistics. Coronavirus and the social impacts on Great Britain: 8 January  
25 2021.  
26  
27 [https://www.ons.gov.uk/peoplepopulationandcommunity/healthandsocialcare/healthandwe](https://www.ons.gov.uk/peoplepopulationandcommunity/healthandsocialcare/healthandwellbeing/bulletins/coronavirusandthesocialimpactsongreatbritain/8january2021)  
28 [llbeing/bulletins/coronavirusandthesocialimpactsongreatbritain/8january2021](https://www.ons.gov.uk/peoplepopulationandcommunity/healthandsocialcare/healthandwellbeing/bulletins/coronavirusandthesocialimpactsongreatbritain/8january2021) [accessed 9  
29 Jan 2021]  
30  
31  
32  
33 29 Olding J, Zisman S, Olding C, et al. Penetrating trauma during a global pandemic: Changing  
34 patterns in interpersonal violence, self-harm and domestic violence in the Covid-19 outbreak.  
35 *Surgeon* 2020;14:337–9. doi:10.1016/j.surge.2020.07.004 [published Online First: 30 Jul  
36 2020]  
37  
38  
39  
40 30 Iob E, Steptoe A, Fancourt D. Abuse, self-harm and suicidal ideation in the UK during the  
41 COVID-19 pandemic. *Br J Psychiatry* 2020;217:543–6. doi:10.1192/bjp.2020.130. [published  
42 Online First: 13 Jul 2020]  
43  
44  
45  
46 31 Christley RM, Murray JK, Anderson KL, et al. Impact of the first COVID-19 lockdown on  
47 management of pet dogs in the UK. *Animals* 2021;11:E5. doi: 10.3390/ani11010005.  
48  
49  
50  
51 32 Applebaum JW, Tomlinson CA, Matijczak A, et al. The concerns, difficulties, and stressors of  
52 caring for pets during covid-19: Results from a large survey of U.S. pet owners. *Animals*  
53 2020;10:1–14. doi:10.3390/ani10101882 [published Online First: 22 Dec 2020]  
54  
55  
56 33 Mills DS, Braem Dube M, Zulch H. *Stress and pheromonotherapy in small animal clinical*  
57 *behaviour*. Chichester: Wiley Blackwell 2013.  
58  
59  
60 34 Arhant C, Landenberger R, Beetz A, et al. Attitudes of caregivers to supervision of child–family

- 1  
2  
3 dog interactions in children up to 6 years—An exploratory study. *J Vet Behav Clin Appl Res*  
4 2016;14:10–6. doi:10.1016/j.jveb.2016.06.007  
5  
6  
7 35 Franchini S, Spessot M, Landoni G, et al. Stranger months: How SARS-CoV-2, fear of  
8 contagion, and lockdown measures impacted attendance and clinical activity during February  
9 and March 2020 at an urban Emergency Department in Milan. *Disaster Med Public Health*  
10 *Prep* 2020;1–10. doi:10.1017/dmp.2020.265 [published Online First: 27 Jul 2020]  
11  
12  
13  
14 36 Morgan L, Protopopova A, Birkler RID, et al. Human-dog relationships during COVID-19  
15 pandemic: booming dog adoption during social isolation. *Humanit Soc Sci Commun*  
16 2020;7:155. doi: 10.1057/s41599-020-00649-x [published Online First: 24 Nov 2020]  
17  
18  
19  
20 37 The Kennel Club. Breed registration statistics.  
21 <https://www.thekennelclub.org.uk/registration/breed-registration-statistics/> [accessed 14  
22 Jan 2021]  
23  
24  
25  
26 38 The Kennel Club. The COVID-19 puppy boom - one in four admit impulse buying a pandemic  
27 puppy. [https://www.thekennelclub.org.uk/media-centre/2020/august/the-covid-19-puppy-](https://www.thekennelclub.org.uk/media-centre/2020/august/the-covid-19-puppy-boom-one-in-four-admit-impulse-buying-a-pandemic-puppy/)  
28 [boom-one-in-four-admit-impulse-buying-a-pandemic-puppy/](https://www.thekennelclub.org.uk/media-centre/2020/august/the-covid-19-puppy-boom-one-in-four-admit-impulse-buying-a-pandemic-puppy/) [accessed 14 Jan 2021]  
29  
30  
31  
32 39 RCVS. Coronavirus (Covid-19). [https://www.rcvs.org.uk/setting-standards/advice-and-](https://www.rcvs.org.uk/setting-standards/advice-and-guidance/coronavirus-covid-19/)  
33 [guidance/coronavirus-covid-19/](https://www.rcvs.org.uk/setting-standards/advice-and-guidance/coronavirus-covid-19/) [accessed 20 Jan 2021]  
34  
35  
36  
37

### Figure Legends

38  
39  
40 **Figure 1** – Annual dog bite attendance rates (cases per 1000 attendances) to a UK paediatric  
41 emergency department (2016-2020)  
42

43  
44 **Figure 2** – Monthly attendance numbers, for all attendances and dog bite victims, in a UK paediatric  
45 emergency department (2016-2020). Blue line = dog bites, Red line = total attendances.  
46  
47

48  
49 **Figure 3** – Monthly dog bite attendance rates (cases per 1000 attendances) for a UK paediatric  
50 emergency department (2016-2020). Blue line = Raw data, Red line = predicted data for 2020 based  
51 on 2016-2019 data.  
52  
53  
54  
55  
56  
57  
58  
59  
60

1  
2  
3  
4  
5  
6  
7  
8  
9  
10  
11  
12  
13  
14  
15  
16  
17  
18  
19  
20  
21  
22  
23  
24  
25  
26  
27  
28  
29  
30  
31  
32  
33  
34  
35  
36  
37  
38  
39  
40  
41  
42  
43  
44  
45  
46  
47  
48  
49  
50  
51  
52  
53  
54  
55  
56  
57  
58  
59  
60

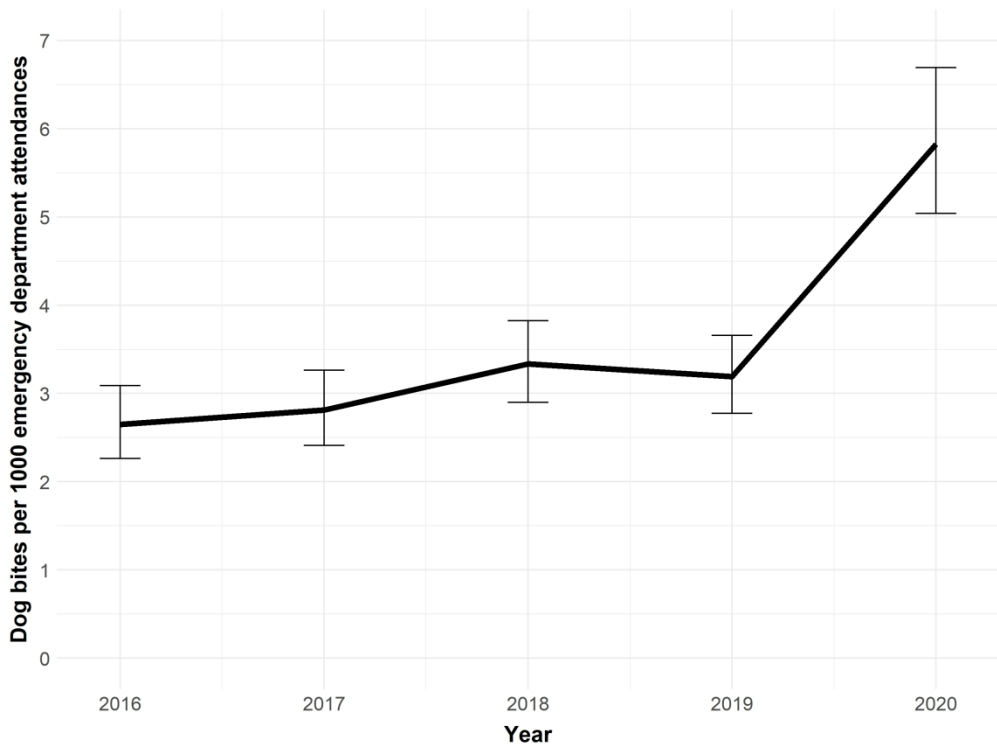

253x188mm (300 x 300 DPI)

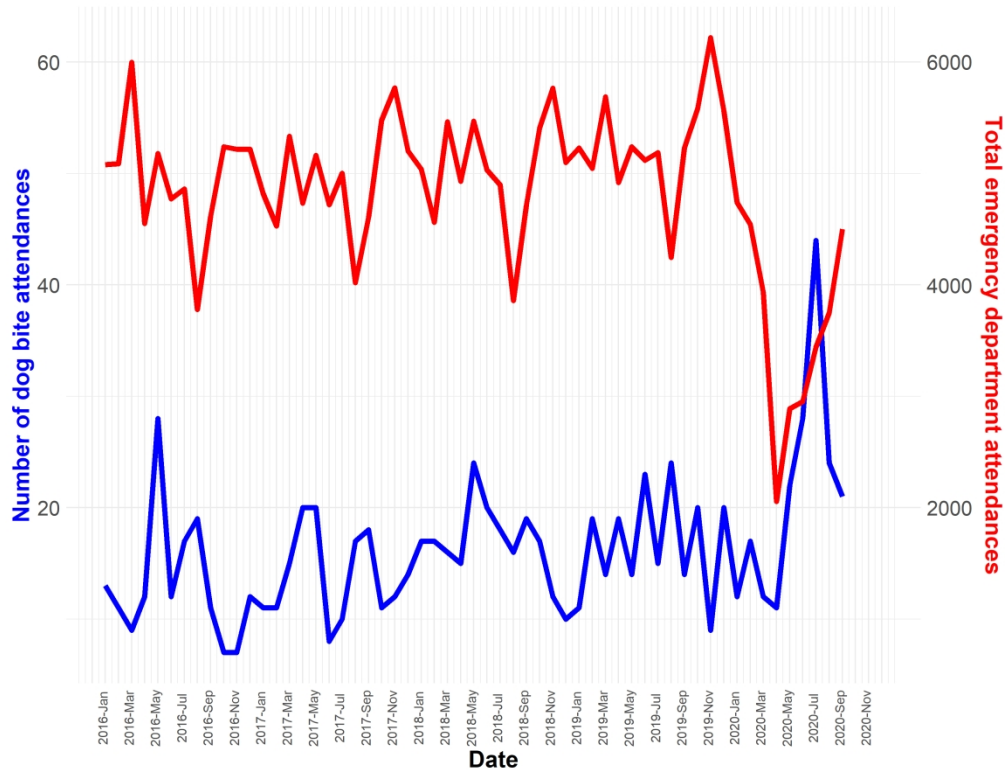

274x214mm (300 x 300 DPI)

1  
2  
3  
4  
5  
6  
7  
8  
9  
10  
11  
12  
13  
14  
15  
16  
17  
18  
19  
20  
21  
22  
23  
24  
25  
26  
27  
28  
29  
30  
31  
32  
33  
34  
35  
36  
37  
38  
39  
40  
41  
42  
43  
44  
45  
46  
47  
48  
49  
50  
51  
52  
53  
54  
55  
56  
57  
58  
59  
60

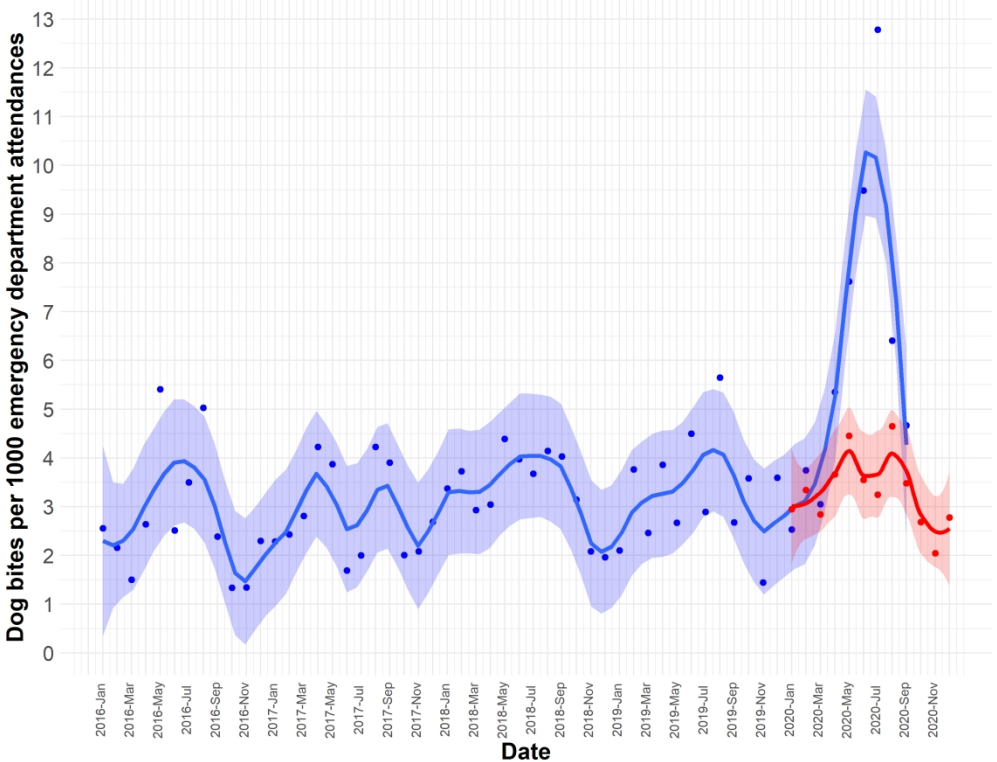

274x214mm (300 x 300 DPI)

# BMJ Paediatrics Open

## Paediatric Emergency Department dog bite attendance during the COVID-19 pandemic: an audit at a tertiary children's hospital

|                               |                                                                                                                                                                                                                                                                                                                                                                                                                                                                                                                                                                                                               |
|-------------------------------|---------------------------------------------------------------------------------------------------------------------------------------------------------------------------------------------------------------------------------------------------------------------------------------------------------------------------------------------------------------------------------------------------------------------------------------------------------------------------------------------------------------------------------------------------------------------------------------------------------------|
| Journal:                      | <i>BMJ Paediatrics Open</i>                                                                                                                                                                                                                                                                                                                                                                                                                                                                                                                                                                                   |
| Manuscript ID                 | bmjpo-2021-001040.R1                                                                                                                                                                                                                                                                                                                                                                                                                                                                                                                                                                                          |
| Article Type:                 | Original research                                                                                                                                                                                                                                                                                                                                                                                                                                                                                                                                                                                             |
| Date Submitted by the Author: | 26-Feb-2021                                                                                                                                                                                                                                                                                                                                                                                                                                                                                                                                                                                                   |
| Complete List of Authors:     | Tulloch, John; University of Liverpool, Institute of Infection, Veterinary and Ecological Sciences<br>Minford, Simon; Alder Hey Children's NHS Foundation Trust, Department of Plastic Surgery<br>Pimblett, Vicky; Alder Hey Children's NHS Foundation Trust, Department of Plastic Surgery<br>Rotheram, Matt; Alder Hey Children's NHS Foundation Trust, Emergency Department<br>Christley, Robert; Dogs Trust; University of Liverpool, Institute of Infection, Veterinary and Ecological Sciences<br>Westgarth, Carri; University of Liverpool, Institute of Infection, Veterinary and Ecological Sciences |
| Keywords:                     | COVID-19, Epidemiology                                                                                                                                                                                                                                                                                                                                                                                                                                                                                                                                                                                        |
|                               |                                                                                                                                                                                                                                                                                                                                                                                                                                                                                                                                                                                                               |

SCHOLARONE™  
Manuscripts



I, the Submitting Author has the right to grant and does grant on behalf of all authors of the Work (as defined in the below author licence), an exclusive licence and/or a non-exclusive licence for contributions from authors who are: i) UK Crown employees; ii) where BMJ has agreed a CC-BY licence shall apply, and/or iii) in accordance with the terms applicable for US Federal Government officers or employees acting as part of their official duties; on a worldwide, perpetual, irrevocable, royalty-free basis to BMJ Publishing Group Ltd ("BMJ") its licensees and where the relevant Journal is co-owned by BMJ to the co-owners of the Journal, to publish the Work in this journal and any other BMJ products and to exploit all rights, as set out in our [licence](#).

The Submitting Author accepts and understands that any supply made under these terms is made by BMJ to the Submitting Author unless you are acting as an employee on behalf of your employer or a postgraduate student of an affiliated institution which is paying any applicable article publishing charge ("APC") for Open Access articles. Where the Submitting Author wishes to make the Work available on an Open Access basis (and intends to pay the relevant APC), the terms of reuse of such Open Access shall be governed by a Creative Commons licence – details of these licences and which [Creative Commons](#) licence will apply to this Work are set out in our licence referred to above.

Other than as permitted in any relevant BMJ Author's Self Archiving Policies, I confirm this Work has not been accepted for publication elsewhere, is not being considered for publication elsewhere and does not duplicate material already published. I confirm all authors consent to publication of this Work and authorise the granting of this licence.

**Title:** Paediatric Emergency Department dog bite attendance during the COVID-19 pandemic: an audit at a tertiary children's hospital

**Authors**

\*John SP Tulloch <sup>1</sup>

Simon Minford <sup>2</sup>

Vicky Pimblett <sup>2</sup>

Matt Rotheram <sup>3</sup>

Robert M Christley <sup>4,1</sup>

Carri Westgarth <sup>1</sup>

**Affiliations**

1. Institute of Infection, Veterinary and Ecological Sciences, University of Liverpool, CH64 7TE, UK
2. Department of Plastic Surgery, Alder Hey Children's NHS Foundation Trust, L14 5AB, UK
3. Emergency Department, Alder Hey Children's NHS Foundation Trust, L14 5AB, UK
4. Dogs Trust, London, EC1V 7RQ, UK

**\*Corresponding Author:** [jtulloch@liverpool.ac.uk](mailto:jtulloch@liverpool.ac.uk)

Department of Livestock and One Health, Institute of Infection, Veterinary and Ecological Sciences, Leahurst Campus, University of Liverpool, Chester High Road, Wirral, CH64 7TE, UK

**Word Count:** 2438

**Key Words:** Dog bites, paediatrics, emergency medicine, emergency department, COVID-19, public health, UK



**Abstract****Background**

Responses to the COVID-19 pandemic include strict public health measures, such as national lockdowns. During these measures paediatric emergency department attendances have declined and the prevalence of presenting complaints has changed. This study sought to identify whether dog bite attendance and victim demographics changed during COVID-19 public health measures.

**Methods**

An audit was conducted of emergency department attendance data from a United Kingdom tertiary paediatric hospital between January 2016 and September 2020. Dog bite attendance and victim demographics were explored using Chi<sup>2</sup> tests, and multivariable Poisson regression. The mean monthly percentage of attendance due to dog bites in 2020 were compared against predicted percentages based on previous years data.

**Results**

Dog bite attendance rose in conjunction with the introduction of COVID-19 public health measures and reached a peak in July 2020 (44 dog bites, 1.3% of all attendances were due to dog bites). This was a three-fold increase in dog bite attendance. By September 2020 attendance had returned to normal. The demographic profile of child dog bite victims remained the same. Boys had the highest attendance rates in 7-12 year olds, girls in 4-6 year olds. Girls showed higher attendance rates in the summer, whilst boys attendance rates were constant throughout the year. COVID-19 public health measures were associated with a 78% increase in attendance for boys, and an 66% increase in girls.

**Conclusions**

COVID-19 national public health measures were associated with an increase in paediatric emergency department dog bite attendance, and may be due to increased child exposure to dogs via 'stay at home' orders and school closures. National lockdowns are likely to continue globally throughout the COVID-19 pandemic; this is likely to result in more dog bites. Urgent public health communication and injury prevention strategies are needed to help prevent these avoidable injuries.

**What is known about the subject:**

- Children are frequent dog bite victims.
- Most children are bitten in the home, by a dog that they know.
- In adults, men are more likely to be bitten than women.

**What this study adds:**

- Emergency attendance for dog bites to children were three times higher than expected during COVID-19 public health measures, (from a monthly mean of 15 cases, to a peak of 44 cases in July 2020).
- The victim profile, regarding the age and sex of the child, did not change.
- COVID-19 public health measures, such as lockdowns and school closures, may result in increased dog bites.

**Introduction:**

The COVID-19 global pandemic, caused by SARS-CoV-2 (severe acute respiratory syndrome coronavirus 2), has affected medicine and public health in a multitude of unforeseen ways. One of these was the significant reduction in patient attendance at paediatric emergency departments during COVID-19 national lockdowns.[1,2] Absolute attendance reduced between 27-72%,[2,3] though this reduction was not seen across all presenting complaints. For example, attendance for trauma has increased and decreased, dependent upon the reporting hospital.[1-3] One trauma of increasing concern is dog bites.

Dog bite hospital admission rates across England have tripled in adults between 1998 and 2018, yet remained stable in children, with a mean child annual admission rate of 14.4 dog bite hospital admissions per 100,000 population per year.[4] Both sexes have their highest admission rates in childhood, peaking between 5-14 years old for boys and 5-9 years old for girls.

The majority of dog bite injuries to children occur to the head;[5-8] 73.3% in English hospital admissions. In Canadian paediatric emergency departments, 25% of bites were classified as severe, 15% of victims were admitted, 7% needed operations, and 0.3% resulted in fatalities.[9] Children are overrepresented in fatal dog attacks; in the USA 55.6% of victims were less than 10 years old,[10] in Canada 86% were under twelve years old,[11] whilst in Europe 16% were less than 10, with 3% less than a year old.[12] United Kingdom (UK) fatality numbers are unknown. Even with excellent management of wounds, the physical and psychological consequences may be long-lasting,[13,14] with 70% of parents of dog bite victims having reported behavioural concerns in their children as a sequelae of the bite.[14]

1  
2  
3 During the COVID-19 pandemic, many public health measures directly affected children, primarily  
4 the implementation of national lockdowns, 'stay at home' orders, the restriction of socialisation  
5 outside their household unit, and the closure of schools.[15,16] Such measures resulted in children  
6 spending more time than usual at home. Previous research has demonstrated that dogs provided  
7 people and families with many positive benefits in lockdown by reducing loneliness, and improving  
8 well-being.[17] However, it is known that the majority of child dog bite victims are bitten inside the  
9 home, ranging from 41-91%,[4,8,18,19] and most dogs involved are known to the victim.[9,18] We,  
10 and others, have theorised that the increased time at home, and resultant increased contact time  
11 with a pet dog, could lead to more dog bites and a subsequent increase in dog bite attendances at  
12 paediatric emergency departments.[20,21] The aim of this study was to understand the impact that  
13 English COVID-19 public health measures had on emergency department dog bite attendance in a  
14 paediatric hospital.

### 23 24 **Methods**

25 An audit of emergency department records was performed at Alder Hey Children's Hospital to  
26 identify trends in the number of dog bites and the percentage of attendances due to dog bites, to  
27 explore patient demographics between the 1<sup>st</sup> of January 2016 and the 30<sup>th</sup> September 2020, and  
28 identify any impact associated with the COVID-19 public health measures. Alder Hey Children's  
29 Hospital has one of the busiest paediatric emergency departments in the UK. It primarily serves the  
30 children of Liverpool and surrounding areas, but major traumas are received from North-West  
31 England, North Wales, and the Isle of Man.

32 Anonymised data were collected from hospital patient electronic health records. These contain  
33 standard information regarding clinical and safeguarding aspects of the child presenting to the  
34 emergency department. The following variables were captured for all attendees of the emergency  
35 department; date of attendance, age, sex, and whether a dog bite was their reason for attendance  
36 (as a binary term). Monthly dog bite attendance counts were plotted, alongside overall attendance  
37 figures. The mean monthly number of dog bites prior to, and during, the COVID-19 public health  
38 measures were compared using a Chi-squared test, and a linear trend with age further evaluated  
39 using a Chi-squared test for trend (also known as a Cochran-Armitage test for trend).

40 The monthly percentage of attendances due to dog bites were calculated, for the whole audit  
41 period, with associated confidence intervals calculated using Byar's method. Monthly attendance  
42 percentages were smoothed using LOESS (locally estimated scatterplot smoothing) methods.[22]  
43 Monthly attendance percentages for 2020 were predicted based on monthly data from 2016-2019,  
44 using the ETS (Error, trend and seasonality) method.[23-25]

1  
2  
3 For this analysis, a binary variable ('COVID-19 Public Health Measures') was assigned to each patient  
4 to indicate whether any national COVID-19 public health measures were in place at the time of  
5 attendance; this variable was assigned the value 1 for attendances within the months March-  
6 September 2020,[15,16] and the value 0 otherwise. To compare the demographics (sex and age) of  
7 dog bite victims during and outside of COVID-19 public health measures, Chi-squared tests were  
8 performed. Age groups were defined as infants (<12 months old), toddlers (1-3 years old), early  
9 childhood (4-6 years old), middle childhood (7-12 years old), and adolescents (13-17 years old).[26]

10 Interrupted Poisson regression time series were performed to assess the following variables  
11 association with monthly attendances for dog bites; time (a linear term, with each unit equating to  
12 an individual month), month of the year, sex, age group, and COVID-19 public health measures. The  
13 number of dog bite victims per month was used as the numerator, whilst the denominator was the  
14 emergency department attending population. Sex specific multivariable models were created.  
15 Interaction between age and sex often occurs when analysing health care data. Thus, presenting sex  
16 stratified models provided clarity to our results, in addition to delivering clear sex dis-aggregated  
17 data as recommended by the World Health Organization.[27] Each model used attendance data for  
18 each specified sex as their denominator. Substantive knowledge was used to select the models with  
19 the best fit (only these will be presented). All models were checked for the presence of any  
20 interaction terms. Goodness-of-fit Chi-squared tests for Poisson models were used to assess model  
21 performance.

22 All statistical analyses were carried out using R language (version 3.5.3). Results were deemed  
23 statistically significant where  $p < 0.05$ . Patients or the public were not involved in this research.

## 24 Results

25 Between the 1<sup>st</sup> January 2016 and the 30<sup>th</sup> September 2020, 919 individuals attended Alder Hey  
26 Children's Hospital's emergency department for a dog bite; over the study period 0.33% (95% CI  
27 0.31-0.36) of all attendances were due to dog bites.

28 Prior to March 2020 the mean monthly total emergency department attendance was 5035 (95% CI  
29 4899-5171). The lowest monthly total number of attendances was recorded in April 2020 (n=2056),  
30 this represents a 2.45 times reduction (Fig 1). The mean monthly dog bite attendance was 15 cases  
31 (95% CI 14-16), the highest monthly dog bite attendance was in July 2020 (n=44), an almost three-  
32 fold increase (ratio: 2.93) compared to mean monthly dog bite attendance. Overall, there was a  
33 significant increase in the mean monthly number of dog bite attendances from before the COVID-19  
34 public health measures and during them (Table 1).

|                                                    | COVID-19 Public Health Measures Absent (Jan 2016-Feb 2020) | COVID-19 Public Health Measures Present (March 2020-Sept 2020) | p value                                    |
|----------------------------------------------------|------------------------------------------------------------|----------------------------------------------------------------|--------------------------------------------|
| <b>Sex</b>                                         |                                                            |                                                                | p=0.68                                     |
| Male                                               | 51.9% (n=393)                                              | 53.7% (n=87)                                                   |                                            |
| Female                                             | 48.1% (n=364)                                              | 46.3% (n=75)                                                   |                                            |
| <b>Age</b>                                         |                                                            |                                                                | $\chi^2$ p=0.42<br>trend $\chi^2$ p = 0.71 |
| Infant (<12 months)                                | 3.6% (n=27)                                                | 1.9% (n=3)                                                     |                                            |
| Toddler (1-3 years)                                | 26.6% (n=201)                                              | 26.5% (n=43)                                                   |                                            |
| Early Child (4-6 years)                            | 21.9% (n=166)                                              | 27.2% (n=44)                                                   |                                            |
| Middle Child (7-12 years)                          | 33.4% (n=253)                                              | 33.3% (n=54)                                                   |                                            |
| Adolescent (13-17 years)                           | 14.5% (n=110)                                              | 11.1% (n=18)                                                   |                                            |
| <b>Total</b>                                       | 757                                                        | 162                                                            |                                            |
| <b>Mean number of dog bites per month (95% CI)</b> | 15.14 (14.09-16.25)                                        | 23.14 (19.78-26.92)                                            | p<0.001                                    |

Table 1 Demographics of paediatric dog bite victims stratified by the presence of national COVID-19 public health measures.

There was no significant difference in the proportion of males and females attending based on whether they attended during COVID-19 public health measures or not ( $\chi^2=0.17$ ,  $p=0.68$ ), nor was there a difference in the proportion of ages attending ( $\chi^2=3.92$ ,  $p=0.42$ ) or evidence of a linear effect of age (Trend  $\chi^2 = 0.13$ ,  $p=0.71$ )

The monthly percentage of attendances due to dog bites prior to 2020 revealed a consistent yet fluctuating pattern, ranging from 0.13% to 0.57%, with a mean monthly percentage of 0.31 (95% CI 0.28-0.34) (Fig 2). The monthly percentages in 2020 deviated from the projected data from May through to August, peaking in July with 1.28% (95% CI 0.94-1.70) of all attendances due to dog bites. This peak reflected a quadrupling (ratio: 4.13) of the average monthly percentage of attendances due to dog bites.

COVID-19 public health measures were independently associated with a 66% increase in dog bite attendance rates in females, and a 78% increase in males (Table 2).

| Variable                                            | Univariable Analysis |         | Female Multivariable Model |         | Male Multivariable Model |         |
|-----------------------------------------------------|----------------------|---------|----------------------------|---------|--------------------------|---------|
|                                                     | ARR (95% CI)         | p-value | ARR (95% CI)               | p-value | ARR (95% CI)             | p-value |
| <b>COVID-19 Public Health Measures (Ref=Absent)</b> |                      |         |                            |         |                          |         |
| Present                                             | 2.29 (1.93-2.71)     | <0.001  | 1.66 (1.18-2.32)           | <0.001  | 1.78 (1.29-2.44)         | <0.001  |
| <b>Time (Linear)</b>                                | 1.01 (1.01-1.02)     | <0.001  | 1.00 (1.00-1.01)           | 0.38    | 1.01 (1.00-1.01)         | 0.03    |
| <b>Year (Ref=2016)</b>                              |                      |         |                            |         |                          |         |
| 2017                                                | 1.06 (0.85-1.32)     | 0.59    | N/A                        |         | N/A                      |         |
| 2018                                                | 1.26 (1.02-1.55)     | 0.03    | N/A                        |         | N/A                      |         |
| 2019                                                | 1.20 (0.98-1.48)     | 0.08    | N/A                        |         | N/A                      |         |
| 2020                                                | 2.20 (1.78-2.71)     | <0.001  | N/A                        |         | N/A                      |         |
| <b>Month (Ref = January)</b>                        |                      |         |                            |         |                          |         |
| February                                            | 1.23 (0.88-1.72)     | 0.23    | 1.69 (1.02-2.88)           | 0.05    | 0.95 (0.60-1.48)         | 0.81    |
| March                                               | 0.97 (0.69-1.37)     | 0.87    | 1.27 (0.75-2.19)           | 0.38    | 0.60 (0.37-0.96)         | 0.04    |
| April                                               | 1.41 (1.02-1.97)     | 0.04    | 1.66 (0.99-2.84)           | 0.06    | 1.08 (0.70-1.67)         | 0.73    |
| May                                                 | 1.76 (1.29-2.40)     | <0.001  | 2.26 (1.41-3.76)           | <0.01   | 1.10 (0.73-1.67)         | 0.65    |
| June                                                | 1.57 (1.14-2.17)     | <0.01   | 1.68 (1.01-2.86)           | 0.05    | 1.12 (0.74-1.70)         | 0.60    |
| July                                                | 1.73 (1.27-2.37)     | <0.001  | 2.05 (1.26-3.42)           | <0.01   | 1.11 (0.74-1.69)         | 0.61    |
| August                                              | 1.98 (1.45-2.72)     | <0.001  | 2.28 (1.39-3.83)           | <0.01   | 1.26 (0.83-1.93)         | 0.28    |
| September                                           | 1.36 (0.99-1.90)     | 0.06    | 1.75 (1.06-2.96)           | 0.03    | 0.75 (0.48-1.17)         | 0.20    |
| October                                             | 0.99 (0.69-1.41)     | 0.94    | 1.28 (0.73-2.27)           | 0.39    | 0.84 (0.52-1.34)         | 0.47    |
| November                                            | 0.68 (0.45-1.00)     | 0.05    | 1.08 (0.60-1.93)           | 0.81    | 0.48 (0.27-0.82)         | 0.01    |
| December                                            | 1.03 (0.72-1.48)     | 0.86    | 1.05 (0.57-1.91)           | 0.87    | 1.06 (0.67-1.66)         | 0.81    |
| <b>Sex (Ref=Female)</b>                             |                      |         |                            |         |                          |         |
| Male                                                | 0.91 (0.80-1.03)     | 0.14    | N/A                        |         | N/A                      |         |
| <b>Age (Ref = Toddler, 1-3 years old)</b>           |                      |         |                            |         |                          |         |
| Infant (<12 months)                                 | 0.19 (0.13-0.28)     | <0.001  | 0.17 (0.09-0.29)           | <0.001  | 0.21 (0.12-0.35)         | <0.001  |
| Early Childhood (4-6 years old)                     | 1.75 (1.45-2.10)     | <0.001  | 1.89 (1.46-2.45)           | <0.001  | 1.53 (1.17-2.00)         | <0.01   |
| Middle Childhood (7-12 years old)                   | 1.70 (1.44-2.01)     | <0.001  | 1.44 (1.13-1.85)           | <0.01   | 1.83 (1.46-2.31)         | <0.001  |
| Adolescent (13-17 years old)                        | 1.30 (1.05-1.61)     | 0.01    | 0.94 (0.68-1.30)           | 0.72    | 1.65 (1.23-2.19)         | <0.001  |

Table 2 – Univariable and multivariable Poisson analysis of monthly paediatric dog bite attendance rates in an emergency department (COVID-19 Public Health Measure were present March 2020 to September 2020. ARR=Attendance Rate Ratio. CI = Confidence interval)

Females had the highest dog bite attendance rates from May through to September. In contrast, male attendance rates were similar throughout the year except in March and November which displayed significantly lower rates. Female attendance rates showed similar attendance rates between toddlers and adolescents, with early and middle childhood showing the highest rates (peaking in early childhood), and infants the lowest. Male age attendance rates peaked in middle childhood. All male age groups had significantly higher rates than toddlers except infants who were significantly lower. To achieve final model fit the 'year' variable was excluded from both models.

1  
2  
3 Both male and female models had good model fits with small residual differences (male model  
4  $p=0.66$ , female model  $p=0.94$ ). No interaction terms were identified.  
5  
6

## 7 **Discussion**

8  
9 This study highlights that COVID-19 public health measures were associated with an increase in the  
10 number paediatric dog bite emergency department attendances, potentially due to children  
11 spending more time at home, with greater exposure to dogs. Additionally, the demographics of  
12 children at risk of dog bites have remained the same during this period. These results can be used to  
13 underpin the need for an evidence-based approach to dog bite injury prevention strategies targeted  
14 at children and their guardians during this pandemic, and future ones.  
15  
16  
17  
18

19  
20 Following four years of stable monthly patterns dog bite attendance, there was a sharp increase in  
21 dog bites and attendance percentage between April and July 2020. An effective tripling in dog bite  
22 attendances, and quadrupling in percentage of attendances. This is confirmed by a clear statistical  
23 association between the period of COVID-19 public health measures and a rise in dog bite  
24 attendances.  
25  
26  
27  
28

29 The national lockdown (March-May 2020),[15,16] saw a rapid reduction in overall emergency  
30 attendance levels, which reached their lowest in April. It was expected that overall attendance levels  
31 would decline as patients and parents were fearful of hospital acquired COVID-19 and were told not  
32 to seek medical aid unless absolutely necessary.[1–3] However, children continued to attend Alder  
33 Hey for dog bites, with no clear decrease in attendance, despite overall attendance numbers  
34 dramatically decreasing (Fig 1).  
35  
36  
37  
38

39 Dog bites numbers did not dramatically increase until May, over a month into the lockdown period.  
40 The initial stable level of dog bites during lockdown was unexpected given another study reported a  
41 rapid increase in dog bite attendance as soon as their lockdown began.[20] During the initial period,  
42 life satisfaction and happiness in adults declined, with anxiety levels raised.[28] Rates of self-harm  
43 and domestic violence also rose.[29,30] These studies highlight that in some households the normal  
44 emotional palette had been disrupted, and this could feasibly include dogs, who are viewed as family  
45 members. Dogs' routines also changed drastically during the first lockdown with 80% spending more  
46 time with children, and having less socialisation with other dogs and less exercise.[31] Dog owners  
47 reported behavioural changes in their dogs and many reported a hesitancy to walk their dog due to  
48 COVID-19 infection risks.[32] The observed time lag in attendances for bites may be due to a lag in  
49 household risk or a lag in attending hospitals.  
50  
51  
52  
53  
54  
55  
56  
57  
58  
59  
60

1  
2  
3 Bite risk may not have increased immediately due to a range of reasons. It may have taken some  
4 time for dogs to exceed their tolerance threshold for behaviours directed towards them, and/or due  
5 to the accumulative effect of separate triggering experiences,[33] particularly where there was  
6 greater activity occurring within homes during lockdown. Parental supervision of their children with  
7 dogs within the home is often limited,[34] and this may have been further impacted during  
8 lockdown with parents having to juggle multiple conflicting demands on their time. In lockdown  
9 there was also a fear of attending hospitals,[35] so it is possible that less severe dog bite injuries  
10 were managed at home.  
11  
12

13  
14  
15  
16  
17 From May through to July the number of dog bite attendances increased faster than overall  
18 attendance number, leading to a higher percentage of attendances being due to dog bites. During  
19 this period, relaxation of public health restrictions and summer weather meant there was potentially  
20 more opportunity for children to be exposed to non-household dogs, providing another source of  
21 risk perhaps more absent previously. There may also have been increased exposure due to  
22 proliferation of dog adoptions and acquisition of 'pandemic puppies' as 2020 progressed.[36,37]  
23 Further, according to UK Kennel Club research, many new puppies were bought on impulse with  
24 little research.[38] Compounded by difficulty accessing professional advice due to 'emergency only'  
25 veterinary provision,[39] and closure of training classes, many dogs acquired during 2020 may have  
26 had inadequate training and socialisation, which may result in a greater likelihood to biting.  
27  
28  
29  
30  
31  
32  
33

34  
35 August and September saw declining dog bite attendances and the percentage of attendances due  
36 to dog bites lowered, both measures returned to the normal range in September coincident with  
37 schools reopening,[15,16] and likely resulted in children spending less time at home with dogs. In a  
38 study in Colorado, dog bite attendance numbers were not assessed beyond cessation of their  
39 lockdown,[20] and it is possible that, as public health measures eased attendance rates would have  
40 returned to normal as our data has.  
41  
42  
43  
44

45  
46 This study found that the sex and age profile of dog bite victims remained the same during the  
47 COVID-19 public health measures, in line with available international trauma data.[1,3] Our data  
48 confirms dog bite seasonality,[4,8,19] but to the best of our knowledge, this work is the first to  
49 describe sex differences related to dog bite seasonality, with dog bites to girls increasing during the  
50 summer, but not to boys; research is needed to understand why.  
51  
52  
53

#### 54 **Limitations**

55  
56 The main limitation of these data is how representative they are of the wider UK population. Alder  
57 Hey Children's Hospital is one of Europe's largest paediatric hospitals, and the community it serves  
58 has one of the largest hospital admission rates for dog bites in the country.[4] This research needs to  
59  
60



1  
2  
3 be repeated at a national scale. For this audit, only case count and basic demographic information of  
4 the victims was captured. Further work exploring the association of COVID-19 public health  
5 measures with severity and anatomical location of the bites, and the context of the bite, is critically  
6 important if we are to understand why dog bites increased. The variable 'COVID-19 Public Health  
7 Measures' encompasses a complex range of measures varying in timing and likely impact. It is likely  
8 that multiple confounding and interacting factors led to the increase in dog bite attendance rates. It  
9 was felt that the pragmatic decision to choose a broad definition was justified. All our hypotheses as  
10 to why dog bites rose are speculative, and more research is needed.  
11  
12  
13  
14  
15  
16

### 17 **Conclusions**

18  
19 On the 5<sup>th</sup> January 2021 the UK was once again told to 'Stay at Home'; this third COVID-19 lockdown  
20 is expected to last at least two months. Lockdowns across the world will continue until public health  
21 measures are successful in bringing the COVID-19 pandemic to an end. Until that time, lockdowns  
22 and school closures are likely to be associated with a rise in paediatric dog bites. The victims who  
23 attend emergency departments probably have the most severe injuries and represent only a portion  
24 of the bitten population. There will be potentially thousands of children who receive preventable  
25 and life changing physical and psychological injuries. Urgent public health communication and  
26 education is needed to raise awareness of increased dog bite risk and promote safe interactions with  
27 dogs, thus ensuring that waves of dog bites do not follow strict COVID-19 public health measures.  
28  
29  
30  
31  
32  
33  
34  
35  
36  
37  
38

39 **Acknowledgements:** This work uses data provided by patients and collected by Alder Hey Children's  
40 Hospital as part of their care and support and would not be possible without access to these data.  
41 These data lead to valuable improvements in research and patient care. We would like to  
42 acknowledge the staff of Alder Hey Children's hospital who provide incredible care and support to  
43 the communities they serve. Finally, we would like to thank the Merseyside Dog Safety Partnership  
44 (<https://merseydogsafe.co.uk/>) who provided excellent advice about our work, and who strive to  
45 help local communities keep their dogs, children, family and friends safe.  
46  
47  
48  
49  
50

51 **Author Contribution:** JT, SM, MR, and CW conceptualised and designed the study. SM and VP  
52 collected, cleaned and anonymised the data. JT and RC designed and performed the data analysis. JT  
53 and CW drafted the initial manuscript. All authors reviewed and revised the manuscript, and  
54 approved of the final submitted manuscript.  
55  
56

57  
58 **Funding:** The authors received no funding for this research from any funding agency in the public,  
59 commercial or not for profit sectors.  
60

1  
2  
3 **Competing Interests:** None declared by JT, SM, MR, VP and CW. RC is employed by Dogs Trust, the  
4 UK's largest dog welfare charity; Dogs Trust had no influence on the design of the study; in the  
5 collection, analyses, or interpretation of data; in the writing of the manuscript, or in the decision to  
6 publish the results.  
7  
8  
9

10 **Patient and public involvement:** Patients and/or the public were not involved in the design, or  
11 conduct, or reporting, or dissemination plans of this research.  
12  
13

14 **Patient consent for publication:** Not required.  
15  
16

17 **Ethics approval:** The study was defined as clinical audit and as such Research Ethics Committee  
18 Review was not necessary. The audit was approved by the Alder Hey Children's NHS Foundation  
19 Trust (Audit Reference Number: 6193).  
20  
21  
22  
23

24 **Data availability statement:** Data are available on reasonable request.  
25  
26  
27  
28  
29  
30  
31

## 32 References

- 33 1 Chaayachati BH, Agawu A, Zorc JJ, et al. Trends in pediatric emergency department utilization  
34 after institution of Coronavirus Disease-19 mandatory social distancing. *J Pediatr*  
35 2020;226:274-277.e1. doi:10.1016/j.jpeds.2020.07.048 [published Online First: 20 July 2020]  
36  
37
- 38 2 Keays G, Freeman D, Gagnon I. Injuries in the time of COVID-19. *Heal Promot Chronic Dis Prev*  
39 *Canada* 2020;40:336-41. doi:10.24095/hpcdp.40.11/12.02 [published Online First: 11 Sept  
40 2020]  
41  
42  
43
- 44 3 McDonnell T, Nicholson E, Conlon C, et al. Assessing the impact of COVID-19 public health  
45 stages on paediatric emergency attendance. *Int J Environ Res Public Health* 2020;17:6719.  
46 doi:10.3390/ijerph17186719 [published Online First: 15 Sept 2020]  
47  
48  
49
- 50 4 Tulloch JSP, Owczarczak-Garstecka SC, Fleming KM, et al. English hospital episode data  
51 analysis (1998 – 2018) reveal that the rise in dog bite hospital admissions is driven by adult  
52 cases. *Sci Rep* 2021;11:1767. doi: 10.1038/s41598-021-81527-7 [published Online First: 19  
53 Jan 2021]  
54  
55  
56
- 57 5 Morgan M, Palmer J. Dog bites. *BMJ* 2007;334:413. doi:10.1136/bmj.39105.659919.BE  
58  
59  
60

- 1  
2  
3 [published Online First: Feb 22 2007]  
4  
5  
6 6 Rollett R, Clancy R, Taib BG, *et al.* RE: Not a plastic surgeon's best friend: Dog bites an  
7 increasing burden on UK plastic surgery services. *J Plast Reconstr Aesthetic Surg*  
8 2019;72:685–710. doi:10.1016/j.bjps.2018.12.053 [published Online First: 15 Jan 2019]  
9  
10  
11 7 Mannion CJ, Graham A. Dog bite injuries in hospital practice. *Br J Hosp Med* 2016;77:C165–8.  
12 doi:10.12968/hmed.2016.77.10.C165. [published Online First: 10 Oct 2016]  
13  
14  
15 8 Loder RT. The demographics of dog bites in the United States. *Heliyon* 2019;5:e01360.  
16 doi:10.1016/j.heliyon.2019.e01360 [published Online First: 20 March 2019]  
17  
18  
19 9 Lang ME, Klassen T. Dog bites in Canadian children: A five-year review of severity and  
20 emergency department management. *Can J Emerg Med* 2005;7:309–14.  
21 doi:10.1017/S1481803500014494 [published Online First: 21 May 2015]  
22  
23  
24  
25 10 Langley RL. Human fatalities resulting from dog attacks in the United States, 1979–2005.  
26 *Wilderness Environ Med* 2009;20:19–25. doi:10.1580/08-WEME-OR-213.1  
27  
28  
29 11 Raghavan M. Fatal dog attacks in Canada, 1990–2007. *Can Vet J* 2008;49:577–81.  
30  
31  
32 12 Sarenbo S, Svensson PA. Bitten or struck by dog: A rising number of fatalities in Europe,  
33 1995–2016. *Forensic Sci Int* 2020;318:110592. doi:10.1016/j.forsciint.2020.110592.  
34 [published Online First: 12 Nov 2020]  
35  
36  
37 13 Jakeman M, Oxley JA, Owczarczak-Garstecka SC, *et al.* Pet dog bites in children: management  
38 and prevention. *BMJ Paediatr Open* 2020;4:e000726. doi:10.1136/bmjpo-2020-000726.  
39 [published Online First: 11 Aug 2020]  
40  
41  
42  
43 14 Boat BW, Dixon CA, Pearl E, *et al.* Pediatric dog bite victims : a need for a continuum of care.  
44 *Clin Pediatr (Phila)* 2012;51:473-7. doi:10.1177/0009922811435504. [published Online First:  
45 31 Jan 2012]  
46  
47  
48  
49 15 Coronavirus Act 2020 (c7). <https://www.legislation.gov.uk/ukpga/2020/7/contents/enacted>  
50  
51 16 The Health Protection (Coronavirus, Restrictions) (England) Regulations 2020.  
52 <https://www.legislation.gov.uk/uksi/2020/350/contents/made>  
53  
54  
55 17 Oliva JL, Johnston KL. Puppy love in the time of Corona: dog ownership protects against  
56 loneliness for those living alone during the COVID-19 lockdown. *Int J Soc Psychiatry*  
57 2020;Published Online First: 2020: 0020764020944195. doi:10.1177/0020764020944195.  
58 [published Online First: 23 Jul 2020]  
59  
60

- 1  
2  
3 18 Oxley JA, Christley R, Westgarth C. Contexts and consequences of dog bite incidents. *J Vet*  
4 *Behav* 2018;23:33–9. doi:10.1016/j.jveb.2017.10.005. [published Online First: 28 Oct 2017]  
5  
6  
7 19 Cornelissen JMR, Hopster H. Dog bites in The Netherlands: A study of victims, injuries,  
8 circumstances and aggressors to support evaluation of breed specific legislation. *Vet J*  
9 2010;186:292–8. doi:10.1016/j.tvjl.2009.10.001. [published Online First 29 Oct 2009]  
10  
11  
12  
13 20 Dixon CA, Mistry RD. Dog Bites in children surge during Coronavirus Disease-2019: A case for  
14 enhanced prevention. *J Pediatr* 2020;225:231–2. doi:10.1016/j.jpeds.2020.06.071. [published  
15 Online First: 25 Jun 2020]  
16  
17  
18  
19 21 Merseyside Dog Safety Partnership. Campaign: Help fight COVID-19 by staying safe around  
20 dogs. 2020. <https://merseydogsafe.co.uk/help-fight-covid-19-by-staying-safe-around-dogs/>  
21 [accessed 14 Jan 2021]  
22  
23  
24 22 Jacoby WG. Loess: A nonparametric, graphical tool for depicting relationships between  
25 variables. *Elect Stud* 2000;19:577–613. doi:10.1016/S0261-3794(99)00028-1  
26  
27  
28  
29 23 Hyndman R, Khandakar Y. Automatic time series forecasting: the forecast package for R. *J*  
30 *Stat Softw* 2008;27. doi: 10.18637/jss.v027.i03  
31  
32  
33 24 Wickham H, Averick M, Bryan J, et al. Welcome to the Tidyverse. *J Open Source Softw*  
34 2019;4:1686. doi:10.21105/joss.01686  
35  
36  
37 25 Hyndman R, Athanasopoulos G. Forecasting: principles and practice. OTexts:Melbourne,  
38 Australia 2018. OTexts.com/fpp2. [accessed 14 Jan 2021]  
39  
40  
41 26 Abdel-Rahman SM, Amidon GL, Kaul A, et al. Summary of the National Institute of Child  
42 Health and Human Development-best pharmaceuticals for Children Act Pediatric Formulation  
43 Initiatives Workshop-Pediatric Biopharmaceutics Classification System Working Group. *Clin*  
44 *Ther* 2012;34:S11–24. doi:10.1016/j.clinthera.2012.09.014 [published Online First 1 Nov 2013]  
45  
46  
47  
48 27 World Health Organization. World health statistics 2019: monitoring health for the SDGs,  
49 sustainable development goals. <https://apps.who.int/iris/handle/10665/324835>. [accessed  
50 14 Jan 2021]  
51  
52  
53  
54 28 Office for National Statistics. Coronavirus and the social impacts on Great Britain: 8 January  
55 2021.  
56 [https://www.ons.gov.uk/peoplepopulationandcommunity/healthandsocialcare/healthandwe  
57 llbeing/bulletins/coronavirusandthesocialimpactsongreatbritain/8january2021](https://www.ons.gov.uk/peoplepopulationandcommunity/healthandsocialcare/healthandwellbeing/bulletins/coronavirusandthesocialimpactsongreatbritain/8january2021) [accessed 9  
58 Jan 2021]  
59  
60

- 1  
2  
3 29 Olding J, Zisman S, Olding C, et al. Penetrating trauma during a global pandemic: Changing  
4 patterns in interpersonal violence, self-harm and domestic violence in the Covid-19 outbreak.  
5 *Surgeon* 2020;14:337–9. doi:10.1016/j.surge.2020.07.004 [published Online First: 30 Jul  
6 2020]  
7  
8  
9  
10  
11 30 Iob E, Steptoe A, Fancourt D. Abuse, self-harm and suicidal ideation in the UK during the  
12 COVID-19 pandemic. *Br J Psychiatry* 2020;217:543–6. doi:10.1192/bjp.2020.130. [published  
13 Online First: 13 Jul 2020]  
14  
15  
16 31 Christley RM, Murray JK, Anderson KL, et al. Impact of the first COVID-19 lockdown on  
17 management of pet dogs in the UK. *Animals* 2021;11:E5. doi: 10.3390/ani11010005.  
18  
19  
20 32 Applebaum JW, Tomlinson CA, Matijczak A, et al. The concerns, difficulties, and stressors of  
21 caring for pets during covid-19: Results from a large survey of U.S. pet owners. *Animals*  
22 2020;10:1–14. doi:10.3390/ani10101882 [published Online First: 22 Dec 2020]  
23  
24  
25 33 Mills DS, Braem Dube M, Zulch H. *Stress and pheromonotherapy in small animal clinical*  
26 *behaviour*. Chichester: Wiley Blackwell 2013.  
27  
28  
29 34 Arhant C, Landenberger R, Beetz A, et al. Attitudes of caregivers to supervision of child–family  
30 dog interactions in children up to 6 years—An exploratory study. *J Vet Behav Clin Appl Res*  
31 2016;14:10–6. doi:10.1016/j.jveb.2016.06.007  
32  
33  
34  
35 35 Franchini S, Spessot M, Landoni G, et al. Stranger months: How SARS-CoV-2, fear of  
36 contagion, and lockdown measures impacted attendance and clinical activity during February  
37 and March 2020 at an urban Emergency Department in Milan. *Disaster Med Public Health*  
38 *Prep* 2020;1–10. doi:10.1017/dmp.2020.265 [published Online First: 27 Jul 2020]  
39  
40  
41  
42 36 Morgan L, Protopopova A, Birkler RID, et al. Human-dog relationships during COVID-19  
43 pandemic: booming dog adoption during social isolation. *Humanit Soc Sci Commun*  
44 2020;7:155. doi: 10.1057/s41599-020-00649-x [published Online First: 24 Nov 2020]  
45  
46  
47  
48 37 The Kennel Club. Breed registration statistics.  
49 <https://www.thekennelclub.org.uk/registration/breed-registration-statistics/> [accessed 14  
50 Jan 2021]  
51  
52  
53 38 The Kennel Club. The COVID-19 puppy boom - one in four admit impulse buying a pandemic  
54 puppy. [https://www.thekennelclub.org.uk/media-centre/2020/august/the-covid-19-puppy-](https://www.thekennelclub.org.uk/media-centre/2020/august/the-covid-19-puppy-boom-one-in-four-admit-impulse-buying-a-pandemic-puppy/)  
55 [boom-one-in-four-admit-impulse-buying-a-pandemic-puppy/](https://www.thekennelclub.org.uk/media-centre/2020/august/the-covid-19-puppy-boom-one-in-four-admit-impulse-buying-a-pandemic-puppy/) [accessed 14 Jan 2021]  
56  
57  
58  
59 39 RCVS. Coronavirus (Covid-19). <https://www.rcvs.org.uk/setting-standards/advice-and->  
60

1  
2  
3 guidance/coronavirus-covid-19/ [accessed 20 Jan 2021]  
4  
5  
6  
7

### 8 **Figure Legends**

9  
10 **Figure 1** – Monthly dog bite attendance and overall emergency department attendance, in a UK  
11 paediatric hospital (2016-2020). Blue line, and left-hand axis = dog bite attendance. Red dashed line,  
12 and right-hand axis = total emergency department attendance. Vertical black line = Start of COVID-  
13 19 public health measures  
14  
15  
16

17 **Figure 2** – Percentage of monthly emergency department attendances due to dog bites for a UK  
18 paediatric hospital (2016-2020). Blue line = Raw data, Red line = predicted data for 2020 based on  
19 2016-2019 data. Vertical black line = Start of COVID-19 public health measures  
20  
21  
22  
23  
24  
25  
26  
27  
28  
29  
30  
31  
32  
33  
34  
35  
36  
37  
38  
39  
40  
41  
42  
43  
44  
45  
46  
47  
48  
49  
50  
51  
52  
53  
54  
55  
56  
57  
58  
59  
60

1  
2  
3  
4  
5  
6  
7  
8  
9  
10  
11  
12  
13  
14  
15  
16  
17  
18  
19  
20  
21  
22  
23  
24  
25  
26  
27  
28  
29  
30  
31  
32  
33  
34  
35  
36  
37  
38  
39  
40  
41  
42  
43  
44  
45  
46  
47  
48  
49  
50  
51  
52  
53  
54  
55  
56  
57  
58  
59  
60

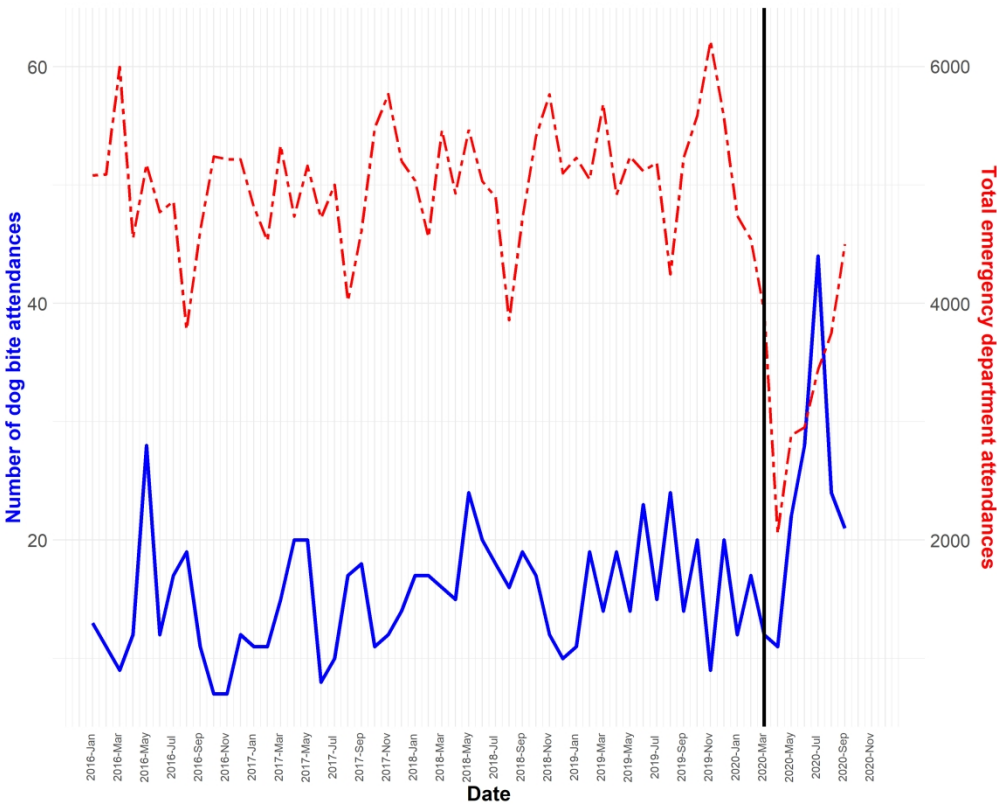

312x252mm (300 x 300 DPI)

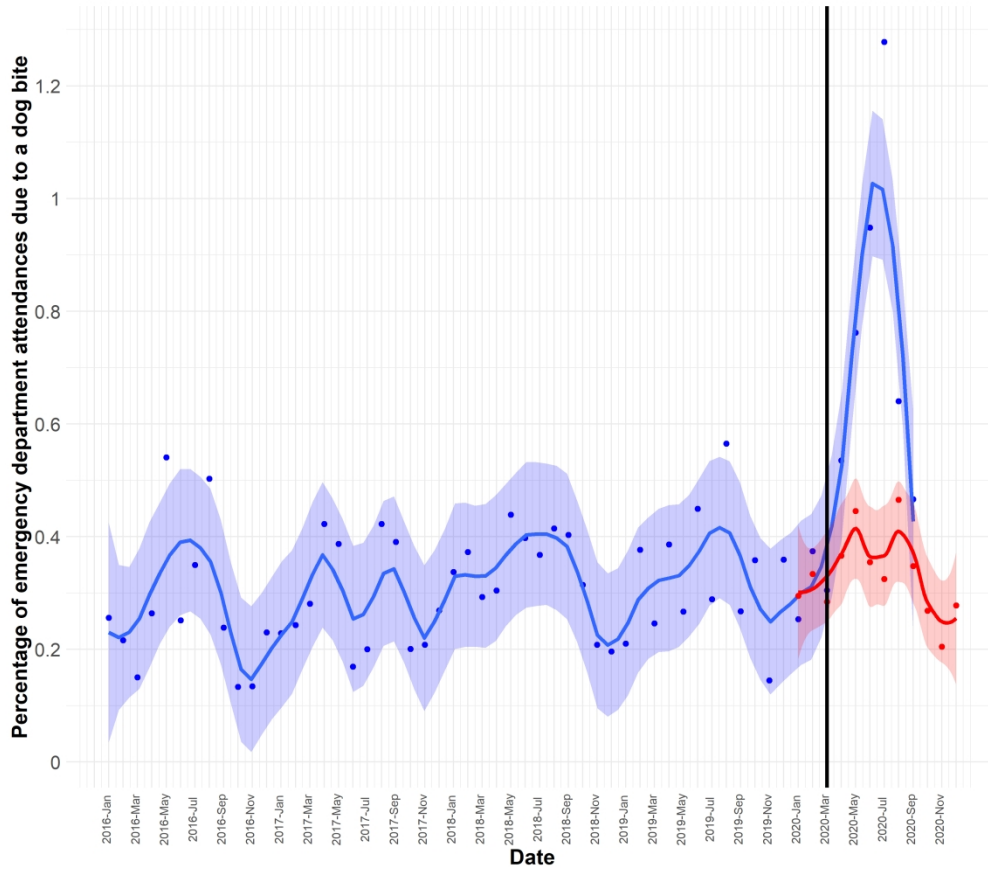

301x263mm (300 x 300 DPI)
